# Supplementary material for: Continuous and ultrafast MOF synthesis using droplet microfluidic nanoarchitectonics
Source: Royal Society of Chemistry journal article supplement (doi:10.1039/d2ta09932b), 2023-01-01
Supplement: d2ta09932b1.pdf [file d2ta09932b1.pdf]

## Supplementary information

### Continuous and ultrafast MOF synthesis using droplet microfluidics nanoarchitectonics

Hsi-Yen Wu,<sup>a</sup> Ching-Ling Wu,<sup>b</sup> Weisheng Liao,<sup>c</sup> Babasaheb M. Matsagar,<sup>c</sup> Keng-Yao Chang,<sup>b</sup> Jen-Huang Huang,<sup>b\*</sup> Kevin C.-W. Wu<sup>a,c\*</sup>

<sup>a</sup>Ph.D. Program of Green Materials and Precision Devices, National Taiwan University, Taipei, 10617, Taiwan

<sup>b</sup>Department of Chemical Engineering, National Tsing Hua University, Hsinchu 30013, Taiwan

<sup>c</sup>Department of Chemical Engineering, National Taiwan University, Taipei, 10617, Taiwan

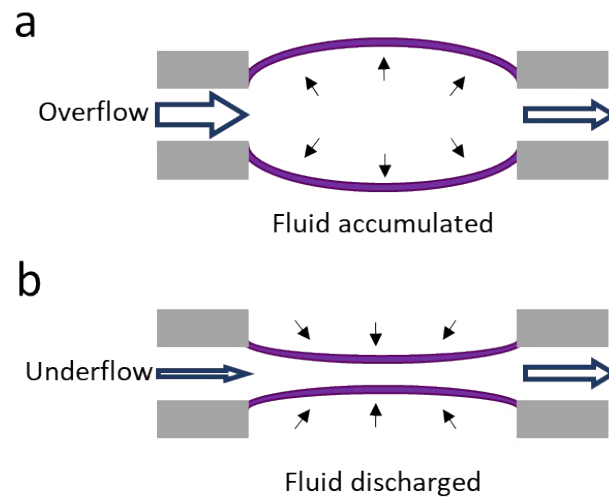

**Figure S1. The principle of flow stabilizer.** (a) The overflow can be spontaneously accumulated in the stabilizer via the expansion of the elastic membrane. (b) The underflow can be adjusted to the steady flow through fluid discharge due to the compression of the elastic membrane. This adjustable fluidic mechanism can eliminate the pulsatile flow and maintain a steady flow speed.

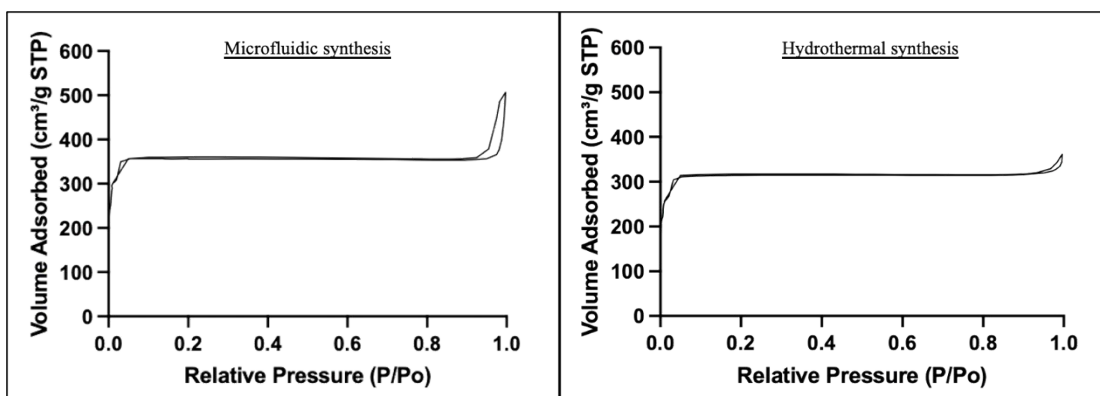

**Figure S2.** N<sub>2</sub> adsorption-desorption isotherms of the ZIF-8 synthesized by microfluidic and hydrothermal approaches.

**Table S1** Summary of the properties of ZIF-8 synthesized by microfluidic and hydrothermal methods

|                                               | Microfluidic synthesis | Hydrothermal synthesis |
|-----------------------------------------------|------------------------|------------------------|
| BET Specific surface area (m <sup>2</sup> /g) | 1844                   | 1302                   |
| Micropore volume (cm <sup>3</sup> /g)         | 0.56                   | 0.45                   |
| Mesopore volume (cm <sup>3</sup> /g)          | 0.22                   | 0.05                   |
| Total pore volume (cm <sup>3</sup> /g)        | 0.78                   | 0.56                   |

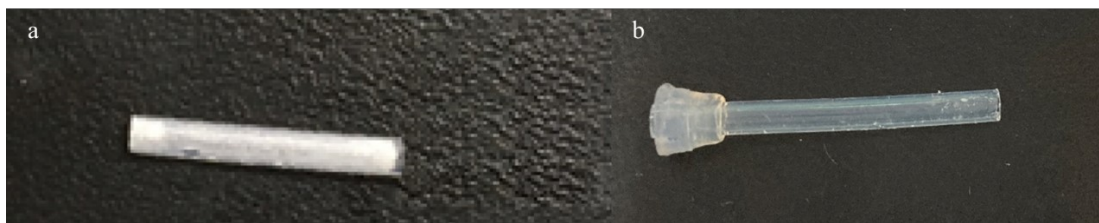

**Figure S3.** The tube after the Y-shaped junction after running the continuous ZIF-8 synthesis system for two hours, at a total precursor flow rate of (a) 100  $\mu\text{L}/\text{min}$ , and (b) 200  $\mu\text{L}/\text{min}$ .

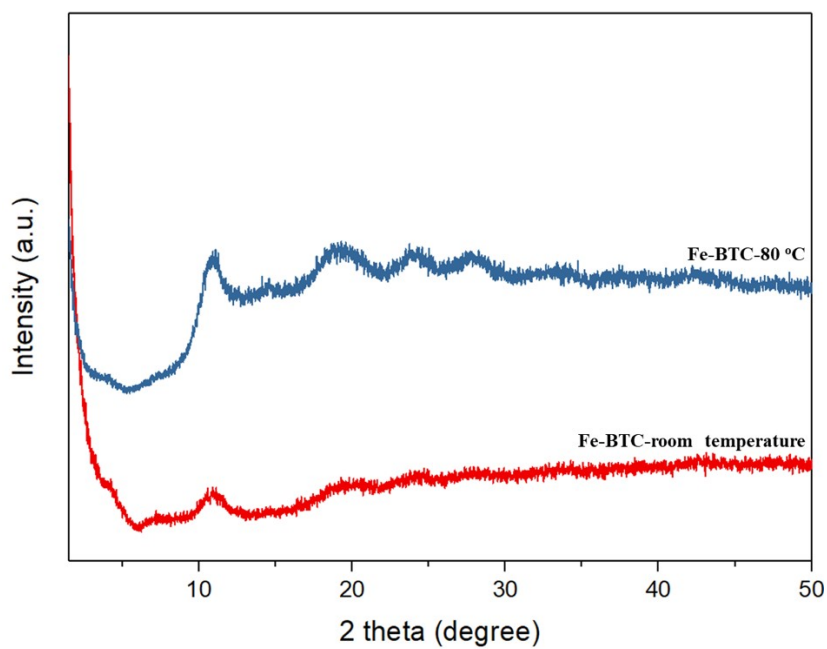

**Figure S4.** The XRD pattern of Fe-BTC synthesis by Fe(III) precursor.

**Table S2.** DLS measurement of microfluidic ZIF-8 and hydrothermal ZIF-8.

| Method       | Number<br>Mean<br>d.nm | PdI   | Z-Ave<br>d.nm | Pk 1<br>Mean Int<br>d.nm | Pk 1<br>Area Int<br>Percent | Pk 2<br>Mean Int<br>d.nm | Pk 2 Area<br>Int<br>Percent |
|--------------|------------------------|-------|---------------|--------------------------|-----------------------------|--------------------------|-----------------------------|
| Microfluidic | 601.3                  | 0.096 | 668.3         | 681.2                    | 100.0                       | -                        | -                           |
| Hydrothermal | 315.1                  | 0.258 | 660.4         | 984.7                    | 86.3                        | 258.3                    | 13.7                        |

**Table S3.** The SEM-EDX element ratio of Au@ZIF-8.

| Element | Weight% | Atomic% |
|---------|---------|---------|
| C K     | 41.93   | 62.56   |
| N K     | 21.64   | 27.69   |
| O K     | 2.34    | 2.63    |
| Zn L    | 21.94   | 6.01    |
| Pt M    | 6.82    | 0.63    |
| Au M    | 5.33    | 0.48    |
| Total   | 100.00  |         |

**Table S4** Size distribution of Au particles in ZIF-8 nanostructures.

| Size (nm) | Distribution (%) |
|-----------|------------------|
| <10       | 42               |
| 10-20     | 26               |
| 20-30     | 16               |
| 30-50     | 12               |
| >50       | 4                |
